# Supplementary material for: Syringe Paper-Based Analytical Device for Thiamazole Detection by Hedysarum Polysaccharides-Mediated Silver Nanoparticles
Source: MDPI journal article supplement (doi:10.3390/mi14020350), 2023-01-30
Supplement: s1 [file s1]

Dan Liu<sup>#</sup>, Xinran Guo<sup>#</sup>, Sanhu Gou and Xinyue Chen<sup>1\*</sup>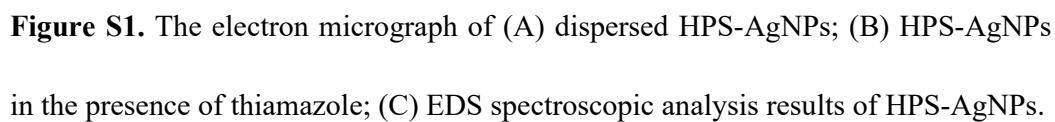

<sup>#</sup>These authors contributed equally to the article.

\* School of Pharmacy, Lanzhou University, Lanzhou, 730000, P. R. China. E-mail:

chenxinyue888@126.com; Tel: (+86) 15293109642

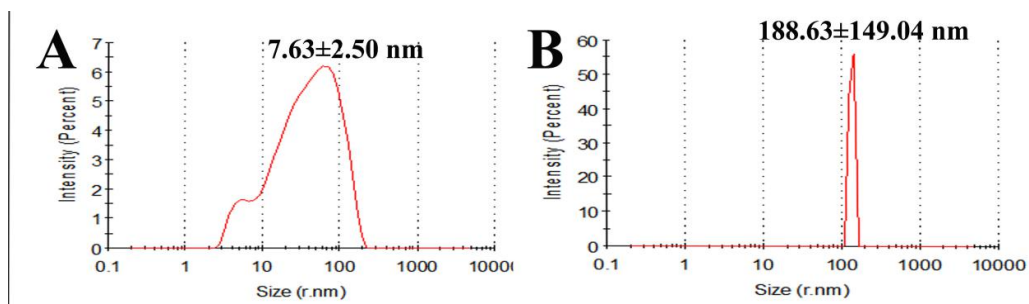

**Figure S2.** The DLS results of (A) dispersed HPS-AgNPs and (B) HPS-AgNPs in the presence of thiamazole
